# Supplementary material for: Nuciferine blocks MIB2-mediated CARD6 polyubiquitination and degradation in the amelioration of high fructose-induced liver lipid accumulation
Source: Royal Society of Chemistry journal article supplement (doi:10.1039/d2fo03622c), 2023-01-01
Supplement: d2fo03622c1.pdf [file d2fo03622c1.pdf]

Supplemental materials

Table 1 List of chemicals used in the study

| Chemicals                          | Source                                            | Identifier       |
|------------------------------------|---------------------------------------------------|------------------|
| Nuciferine                         | AbMole                                            | CAS: 475-83-2    |
| Fructose (for animals)             | Shandong Xiwang Sager Industry Co., Ltd.          | CAS: 7660-25-5   |
| Pioglitazone (for animals)         | HEOWNS                                            | CAS: 111025-46-8 |
| Pioglitazone (for cells)           | Sigma-Aldrich                                     | CAS: 105355-27-9 |
| Fructose (for cells)               | Sigma-Aldrich                                     | CAS: 57-48-7     |
| DMEM                               | Gibco                                             | CAT: 11965084    |
| Opti-MEM                           | Gibco                                             | CAT: 31985070    |
| FBS                                | Zhejiang Tianhang Biological Technology Co., Ltd. | CAT: 11011-8611  |
| HiScript II Q RT SuperMix for qPCR | Nanjing Vazyme Medical Technology Co., Ltd.       | CAT: R222-01     |
| ChamQ™ SYBR® qPCR Master Mix       | Nanjing Vazyme Medical Technology Co., Ltd.       | CAT: Q311-02/03  |
| Cell lysis buffer                  | Beyotime Biotechnology                            | CAT: P0013       |
| Phenylmethanesulfonyl fluoride     | Beyotime Biotechnology                            | CAT: ST506       |
| Modified Oil Red O Staining Kit    | Beyotime Biotechnology                            | CAT: C0158M      |
| Hematoxylin and Eosin Staining Kit | Beyotime Biotechnology                            | CAT: C0105M      |
| Protein A+G Agarose                | Beyotime Biotechnology                            | CAT: P2012       |
| EZview Red Anti-HA Affinity Gel    | Thermo Scientific                                 | CAT: E6779-1ML   |
| BODIPY™ 493/503 staining           | Thermo Scientific                                 | CAT: D3922       |
| Lipofectamine 2000                 | Thermo Scientific                                 | CAT: 11668019    |
| Pierce™ BCA Protein Assay Kit      | Thermo Scientific                                 | CAT: 23227       |
| MG132                              | Selleck                                           | CAT: S2619       |
| Chloroquine diphosphate            | Selleck                                           | CAT: S4157       |
| Triglyceride (TG)                  | Nanjing Jiancheng Bioengineering Institute        | CAT: A110-1      |
| Total cholesterol (TC)             | Nanjing Jiancheng Bioengineering Institute        | CAT: A111-1      |
| D-Glucose                          | Sigma-Aldrich                                     | CAS: 50-99-7     |
| Hoechst 33342                      | Thermo Scientific                                 | CAT: 62249       |

Table 2 List of primers used in RT-qPCR and siRNA

| ID             | Sense primer (5'-3')         | Antisense primer (5'-3') |
|----------------|------------------------------|--------------------------|
| hCARD6         | ATCGAGGATGTAAGTGGACCC        | GATTGAATCCCTAGCCGTCAC    |
| hGAPDH         | AAGAAGGTGGTGAAGCAGG          | GTCAAAGGTGGAGGAGTGG      |
| hMIB2          | CATCGGCGACCTTGACACA          | CGACTGCTACACGCAGGTT      |
| hFASN          | ATCTGGACCCTCCTACCTCTG        | TTCATCCCCATTGACTGTGC     |
| hACC $\alpha$  | GTTGTTGGCCTGCCTCT            | TCTCTTCTGGCTCCTCCTC      |
| hPPAR $\alpha$ | TTGTGGCTGCTATCATTTGC         | CATCCGACTCCGTCTTCTTG     |
| hACOX1         | TCACTTGGGCATGTTCTT           | CCATCTCTGTCTGGGCAT       |
| rCARD6         | TTGTTGTTTCCTCAAGTGTCTG       | GCTATTTCTGGGGTTATGGTC    |
| rGAPDH         | GGCTCTCTGCTCCTCCC            | CCGTTACACCGACCTT         |
| rMIB2          | AAGATTCTGGCAAGAGCACG         | TGTTTCGCACATTCACATCG     |
| rFASN          | GAGGGTTTGGAGTTGAAGAGGA       | CCAGGCTGACACGGTTGACA     |
| rACC $\alpha$  | GAGGAGGGAAGGGAATCAGAAAA<br>G | AGAGCAGTCACGACCAAACAAAGA |
| rPPAR $\alpha$ | ATTTGCCAAGGCTATCCCAGG        | CATCAAGGAGGACAGCATCGTG   |
| rACOX1         | GACTTTCTTGAGGGGAGCATC        | CATCCACCAGAGCAACAGCAT    |
| 1siCARD6       | GGAGUCCAGAUGAAGACACTT        | GUGUCUUCAUCUGGACUCCTT    |
| 2siCARD6       | GCACGAGAUGUGACGGCUATT        | UAGCCGUCACAUCUCGUGCTT    |
| siMIB2         | UGGAGGUGGCGCUGGGUAATT        | UUACCCAGCGCCACCUCCATT    |

h, homo sapiens; r, rat
